# Supplementary material for: Post-birth exposure contrasts for children during the Household Air Pollution Intervention Network randomized controlled trial
Source: bioRxiv or medRxiv preprint supplement (doi:10.1101/2023.07.04.23292226), 2023-07-06
Supplement: Supplementary file [file media-1.pdf]

## Supplemental Information

**Table S1.** Overall indirect PM<sub>2.5</sub> exposure data completeness of children in HAPIN Trial by IRC and visit

| IRC       | Visit | Enrolled | Exposure visits | Exposure data | Fraction with valid exposure data (%) | Fraction of exposure visits with valid data (%) |
|-----------|-------|----------|-----------------|---------------|---------------------------------------|-------------------------------------------------|
| Guatemala | B1    | 754      | 678             | 514           | 68.2                                  | 75.8                                            |
|           | B2    | 748      | 638             | 404           | 54                                    | 63.3                                            |
|           | B4    | 744      | 689             | 284           | 38.2                                  | 41.2                                            |
| India     | B1    | 761      | 672             | 285           | 37.5                                  | 42.4                                            |
|           | B2    | 761      | 684             | 229           | 30.1                                  | 33.5                                            |
|           | B4    | 758      | 724             | 230           | 30.3                                  | 31.8                                            |
| Peru      | B1    | 722      | 417             | 172           | 23.8                                  | 41.2                                            |
|           | B2    | 715      | 406             | 138           | 19.3                                  | 34                                              |
|           | B4    | 711      | 520             | 129           | 18.1                                  | 24.8                                            |
| Rwanda    | B1    | 749      | 602             | 214           | 28.6                                  | 35.5                                            |
|           | B2    | 745      | 614             | 148           | 19.9                                  | 24.1                                            |
|           | B4    | 736      | 583             | 33            | 4.5                                   | 5.7                                             |

**Table S2.** Overall indirect PM<sub>2.5</sub> exposure data completeness of children in HAPIN Trial by IRC, visit, and study arm

| IRC       | Visit | Arm          | Enrolled | Exposure visits | Exposure data | Fraction with valid exposure data (%) | Fraction of exposure visits with valid data (%) |
|-----------|-------|--------------|----------|-----------------|---------------|---------------------------------------|-------------------------------------------------|
| Guatemala | B1    | Control      | 378      | 337             | 259           | 68.5                                  | 76.9                                            |
|           |       | Intervention | 376      | 341             | 255           | 67.8                                  | 74.8                                            |
|           | B2    | Control      | 374      | 318             | 200           | 53.5                                  | 62.9                                            |
|           |       | Intervention | 374      | 320             | 204           | 54.5                                  | 63.8                                            |
|           | B4    | Control      | 373      | 351             | 133           | 35.7                                  | 37.9                                            |
|           |       | Intervention | 371      | 338             | 151           | 40.7                                  | 44.7                                            |
| India     | B1    | Control      | 380      | 330             | 183           | 48.2                                  | 55.5                                            |
|           |       | Intervention | 381      | 342             | 102           | 26.8                                  | 29.8                                            |
|           | B2    | Control      | 380      | 343             | 146           | 38.4                                  | 42.6                                            |
|           |       | Intervention | 381      | 341             | 83            | 21.8                                  | 24.3                                            |
|           | B4    | Control      | 378      | 361             | 149           | 39.4                                  | 41.3                                            |
|           |       | Intervention | 380      | 363             | 81            | 21.3                                  | 22.3                                            |
| Peru      | B1    | Control      | 347      | 196             | 75            | 21.6                                  | 38.3                                            |
|           |       | Intervention | 375      | 221             | 97            | 25.9                                  | 43.9                                            |
|           | B2    | Control      | 341      | 191             | 59            | 17.3                                  | 30.9                                            |
|           |       | Intervention | 374      | 215             | 79            | 21.1                                  | 36.7                                            |
|           | B4    | Control      | 339      | 250             | 59            | 17.4                                  | 23.6                                            |
|           |       | Intervention | 372      | 270             | 70            | 18.8                                  | 25.9                                            |
| Rwanda    | B1    | Control      | 384      | 310             | 112           | 29.2                                  | 36.1                                            |
|           |       | Intervention | 365      | 292             | 102           | 27.9                                  | 34.9                                            |
|           | B2    | Control      | 382      | 310             | 60            | 15.7                                  | 19.4                                            |
|           |       | Intervention | 363      | 304             | 88            | 24.2                                  | 28.9                                            |
|           | B4    | Control      | 379      | 306             | 17            | 4.5                                   | 5.6                                             |
|           |       | Intervention | 357      | 277             | 16            | 4.5                                   | 5.8                                             |

**Table S3.** Overall indirect CO exposure data completeness of children in HAPIN Trial by IRC and visit

| IRC       | Visit | Enrolled | Exposure visits | Exposure data | Fraction with valid exposure data (%) | Fraction of exposure visits with valid data (%) |
|-----------|-------|----------|-----------------|---------------|---------------------------------------|-------------------------------------------------|
| Guatemala | B1    | 754      | 678             | 486           | 64.5                                  | 71.7                                            |
|           | B2    | 748      | 638             | 387           | 51.7                                  | 60.7                                            |
|           | B4    | 744      | 689             | 281           | 37.8                                  | 40.8                                            |
| India     | B1    | 761      | 672             | 362           | 47.6                                  | 53.9                                            |
|           | B2    | 761      | 684             | 310           | 40.7                                  | 45.3                                            |
|           | B4    | 758      | 724             | 295           | 38.9                                  | 40.7                                            |
| Peru      | B1    | 722      | 417             | 163           | 22.6                                  | 39.1                                            |
|           | B2    | 715      | 406             | 135           | 18.9                                  | 33.3                                            |
|           | B4    | 711      | 520             | 94            | 13.2                                  | 18.1                                            |
| Rwanda    | B1    | 749      | 602             | 213           | 28.4                                  | 35.4                                            |
|           | B2    | 745      | 614             | 143           | 19.2                                  | 23.3                                            |
|           | B4    | 736      | 583             | 37            | 5                                     | 6.3                                             |

**Table S4.** Overall indirect CO exposure data completeness of children in HAPIN Trial by IRC, visit, and study arm

| IRC       | Visit | Arm          | Enrolled | Exposure visits | Exposure data | Fraction with valid exposure data (%) | Fraction of exposure visits with valid data (%) |
|-----------|-------|--------------|----------|-----------------|---------------|---------------------------------------|-------------------------------------------------|
| Guatemala | B1    | Control      | 378      | 337             | 248           | 65.6                                  | 73.6                                            |
|           |       | Intervention | 376      | 341             | 238           | 63.3                                  | 69.8                                            |
|           | B2    | Control      | 374      | 318             | 190           | 50.8                                  | 59.7                                            |
|           |       | Intervention | 374      | 320             | 197           | 52.7                                  | 61.6                                            |
|           | B4    | Control      | 373      | 351             | 134           | 35.9                                  | 38.2                                            |
|           |       | Intervention | 371      | 338             | 147           | 39.6                                  | 43.5                                            |
| India     | B1    | Control      | 380      | 330             | 177           | 46.6                                  | 53.6                                            |
|           |       | Intervention | 381      | 342             | 185           | 48.6                                  | 54.1                                            |
|           | B2    | Control      | 380      | 343             | 151           | 39.7                                  | 44                                              |
|           |       | Intervention | 381      | 341             | 159           | 41.7                                  | 46.6                                            |
|           | B4    | Control      | 378      | 361             | 142           | 37.6                                  | 39.3                                            |
|           |       | Intervention | 380      | 363             | 153           | 40.3                                  | 42.1                                            |
| Peru      | B1    | Control      | 347      | 196             | 68            | 19.6                                  | 34.7                                            |
|           |       | Intervention | 375      | 221             | 95            | 25.3                                  | 43                                              |
|           | B2    | Control      | 341      | 191             | 59            | 17.3                                  | 30.9                                            |
|           |       | Intervention | 374      | 215             | 76            | 20.3                                  | 35.3                                            |
|           | B4    | Control      | 339      | 250             | 48            | 14.2                                  | 19.2                                            |
|           |       | Intervention | 372      | 270             | 46            | 12.4                                  | 17                                              |
| Rwanda    | B1    | Control      | 384      | 310             | 111           | 28.9                                  | 35.8                                            |
|           |       | Intervention | 365      | 292             | 102           | 27.9                                  | 34.9                                            |
|           | B2    | Control      | 382      | 310             | 59            | 15.4                                  | 19                                              |
|           |       | Intervention | 363      | 304             | 84            | 23.1                                  | 27.6                                            |
|           | B4    | Control      | 379      | 306             | 17            | 4.5                                   | 5.6                                             |
|           |       | Intervention | 357      | 277             | 20            | 5.6                                   | 7.2                                             |

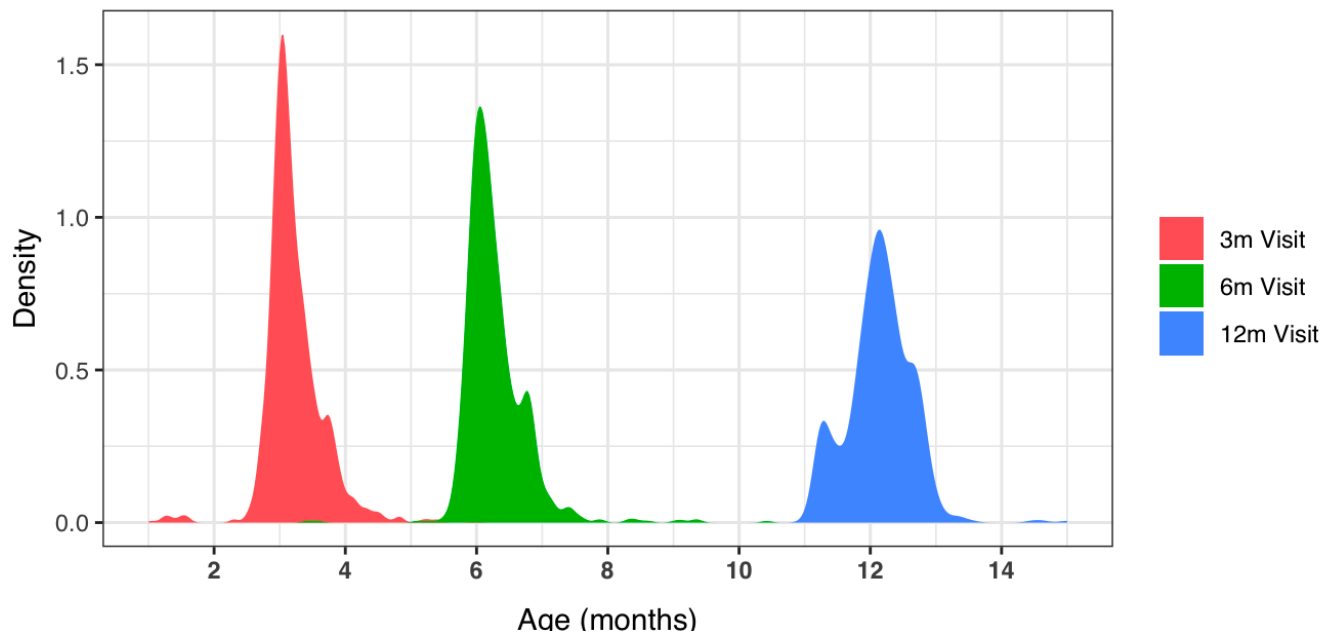

**Figure S1.** Distributions of child's age in months at each study visit.

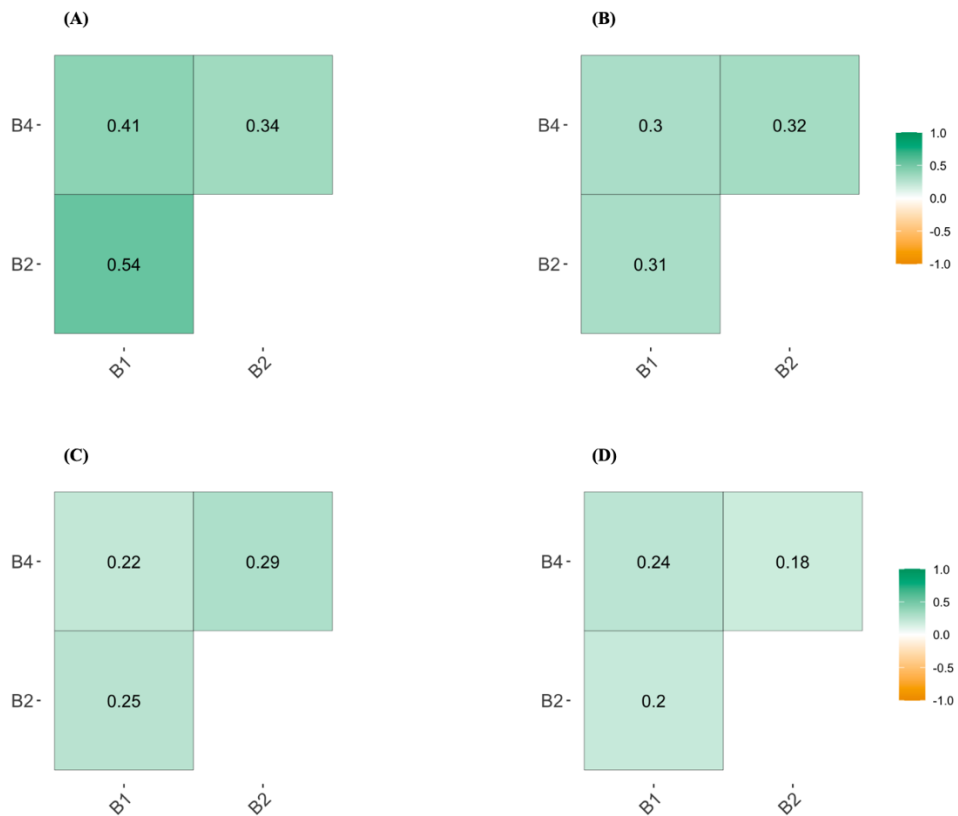

**Figure S2.** Correlations of measured PM<sub>2.5</sub> (A and B) and CO (C and D) exposures by study visit for control (A and C) and intervention households (B and D). B1 indicates visits at <3m, B2 indicates visits at ~6m, and B4 indicates visits at approximately 12m.
